# Supplementary material for: A qualitative systematic review of studies using the normalization process theory to research implementation processes
Source: Springer Nature journal article supplement (doi:10.1186/1748-5908-9-2), 2014-01-02
Supplement: 13012_2013_843_MOESM2_ESM.pdf [file 13012_2013_843_MOESM2_ESM.pdf]

**Interface** - EBSCOhost

**Search Screen** - Advanced Search

**Database** - Academic Search Complete;AMED - The Allied and Complementary Medicine Database; Biomedical Reference Collection: Expanded; CINAHL Plus with Full Text; MEDLINE; OmniFile Full Text Mega (H.W. Wilson);PsycARTICLES; PsycINFO; Social Sciences Full Text (H.W. Wilson);UK & Ireland Reference Centre

|        | Query                                                           | Limiters/Expanders                                                             | Last Run Via                                                                                                                                                                                                                                                                                                                                                         | Results |
|--------|-----------------------------------------------------------------|--------------------------------------------------------------------------------|----------------------------------------------------------------------------------------------------------------------------------------------------------------------------------------------------------------------------------------------------------------------------------------------------------------------------------------------------------------------|---------|
| S<br>2 | "Normalization Process Theory" OR "Normalization Process Model" | Limiters - Scholarly (Peer Reviewed) Journals<br>Search modes - Boolean/Phrase | Interface - EBSCOhost<br>Search Screen - Advanced Search<br>Database - Academic Search Complete;AMED - The Allied and Complementary Medicine Database;Biomedical Reference Collection: Expanded;CINAHL Plus with Full Text;MEDLINE;OmniFile Full Text Mega (H.W. Wilson);PsycARTICLES;PsycINFO;Social Sciences Full Text (H.W. Wilson);UK & Ireland Reference Centre | 28      |
| S<br>1 | "Normalization Process Theory" OR "Normalization Process Model" | Search modes - Boolean/Phrase                                                  | Interface - EBSCOhost<br>Search Screen - Advanced Search<br>Database - Academic Search Complete;AMED - The Allied and Complementary Medicine Database;Biomedical Reference Collection: Expanded;CINAHL Plus with Full Text;MEDLINE;OmniFile Full Text Mega (H.W. Wilson);PsycARTICLES;PsycINFO;Social Sciences Full Text (H.W. Wilson);UK & Ireland Reference Centre | 46      |
