# Supplementary material for: A qualitative systematic review of studies using the normalization process theory to research implementation processes
Source: Springer Nature journal article supplement (doi:10.1186/1748-5908-9-2), 2014-01-02
Supplement: 13012_2013_843_MOESM4_ESM.pdf [file 13012_2013_843_MOESM4_ESM.pdf]

**Additional File 4: Completed PRISMA statement re. A Qualitative Systematic Review of the Literature on Normalization Process Theory in use**

As this was a qualitative review of predominantly qualitative empirical studies, some aspects of the PRISMA statement [1] were not applicable.

| Section/Topic                      | #  | Description                                                                               | Page No.                         |
|------------------------------------|----|-------------------------------------------------------------------------------------------|----------------------------------|
| Title                              | 1  | A systematic qualitative review of the literature on Normalization Process Theory in use. | 1                                |
| <b>ABSTRACT</b>                    |    |                                                                                           |                                  |
| Structured summary                 | 2  |                                                                                           | 3                                |
| <b>INTRODUCTION</b>                |    |                                                                                           |                                  |
| Rationale                          | 3  |                                                                                           | 5-6                              |
| Objectives                         | 4  |                                                                                           | Additional file 2: PICO Table    |
| <b>METHODS</b>                     |    |                                                                                           |                                  |
| Protocol & registration            | 5  | No Protocol registered                                                                    | N/A                              |
| Eligibility criteria               | 6  |                                                                                           | 8-9                              |
| Information sources                | 7  |                                                                                           | 8                                |
| Search                             | 8  |                                                                                           | 8<br>Figure 2: PRISMA Flow Chart |
| Study selection                    | 9  |                                                                                           | 8                                |
| Data collection process            | 10 |                                                                                           | 9                                |
| Data items                         | 11 |                                                                                           | N/A                              |
| Risk of bias in individual studies | 12 |                                                                                           | 8                                |
| Summary measures                   | 13 |                                                                                           | N/A                              |
| Synthesis of results               | 14 |                                                                                           | N/A                              |
| Risk of bias across studies        | 15 |                                                                                           | N/A                              |
| Additional analyses                | 16 |                                                                                           | N/A                              |
| <b>RESULTS</b>                     |    |                                                                                           |                                  |
| Study selection                    | 17 | Flow diagram developed (see Figure 2)                                                     | 8<br>See Figure 2                |
| Study                              | 18 |                                                                                           | See Tables 1 & 2                 |

|                               |    |  |                                 |
|-------------------------------|----|--|---------------------------------|
| characteristics               |    |  |                                 |
| Risk of bias within studies   | 19 |  | 8                               |
| Results of individual studies | 20 |  | Additional File 2<br>PICO Table |
| Synthesis of results          | 21 |  | N/A                             |
| Risk of bias across studies   | 22 |  | N/A                             |
| Additional analysis           | 23 |  | N/A                             |
| <b>DISCUSSION</b>             |    |  |                                 |
| Summary of evidence           | 24 |  | Tables 2 & 3                    |
| Limitations                   | 25 |  | 17                              |
| Conclusions                   | 26 |  | 17-18                           |
| <b>FUNDING</b>                |    |  |                                 |
| Funding                       | 27 |  | 20                              |
|                               |    |  |                                 |

1. Liberati A, Altman D, Tetzlaff J, Mulrow C, Gøtzsche P, Ioannidis J, Clarke M, Devereaux P, Kleijnen J, Moher D: **The PRISMA statement for reporting systematic reviews and meta-analyses of studies that evaluate health care interventions: explanation and elaboration.** *BMJ* 2009, **339**: b2700.
