# Supplementary material for: A qualitative systematic review of studies using the normalization process theory to research implementation processes
Source: Springer Nature journal article supplement (doi:10.1186/1748-5908-9-2), 2014-01-02

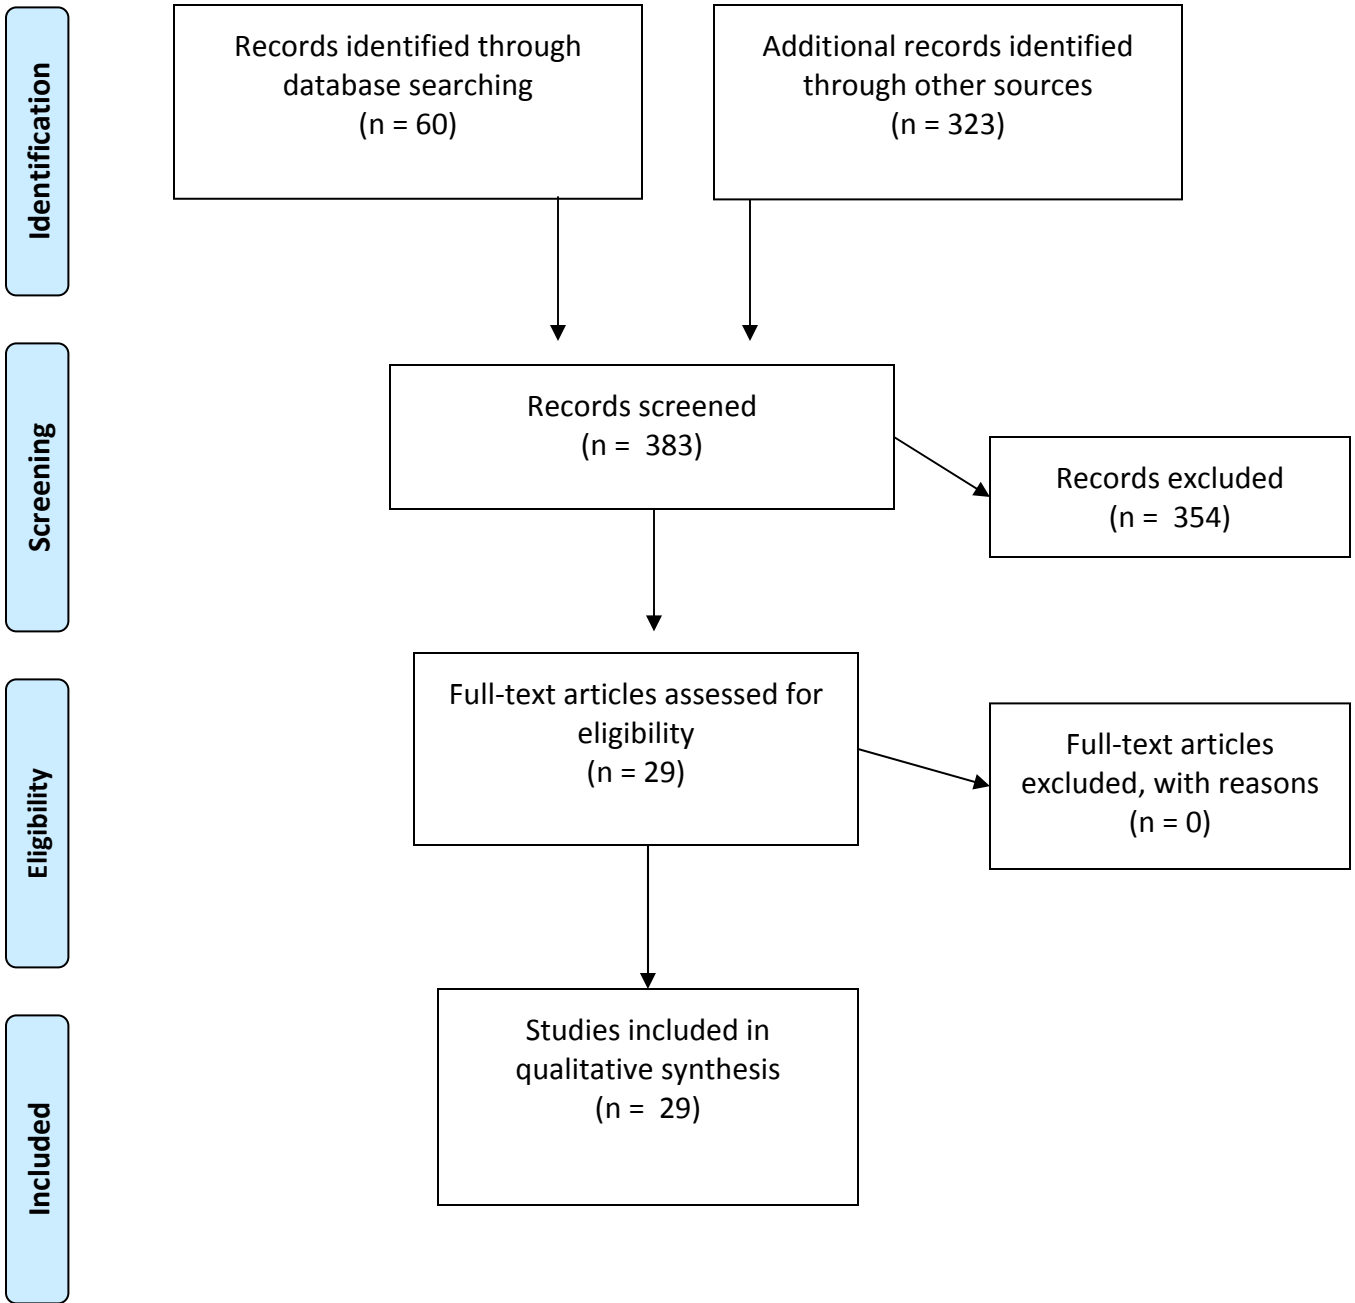

Supplement: 13012_2013_843_MOESM6_ESM.pdf [file 13012_2013_843_MOESM6_ESM.pdf]
